# Supplementary material for: Fine tuning of the photophysical and electroluminescent properties of DCM-type dyes by changing the structure of the electron-donating group
Source: Royal Society of Chemistry journal article supplement (doi:10.1039/b604563d), 2006-01-01
Supplement: b604563d.pdf [file b604563d.pdf]

## Fine tuning on the photophysical and electroluminescent properties of DCM-type dyes by changing the structure of the electron-donating group

Yi-Shan Yao <sup>a</sup>, Qian-Xiong Zhou <sup>a</sup>, Xue-Song Wang <sup>\*a</sup>, Yue Wang <sup>\*b</sup>, Bao-Wen Zhang <sup>\*a</sup>

*a* Technical Institute of Physics and Chemistry, Chinese Academy of Sciences, Beijing 100101, P. R. China  
Tel: 86-010-6488-8103 Fax: 86-010-6487-9375 E-mail: [xswang@mail.ipc.ac.cn](mailto:xswang@mail.ipc.ac.cn); [g203@mail.ipc.ac.cn](mailto:g203@mail.ipc.ac.cn)

*b* Key Laboratory for Supramolecular Structure and Materials of Ministry of Education, College of Chemistry, Jilin University, Chang Chun 130012, P. R. China  
Tel: 86-431-5168-494 Fax: +86-431-5193421 E-mail: [yuewang@jlu.edu.cn](mailto:yuewang@jlu.edu.cn)

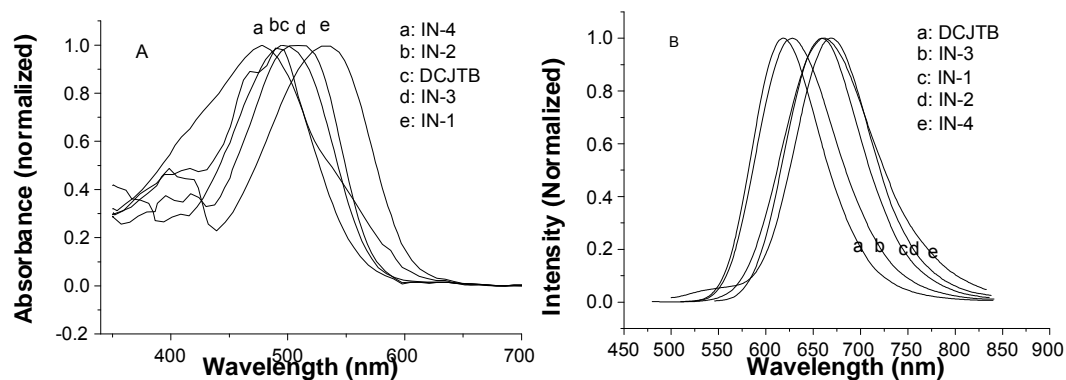

Figure 1S. Normalized absorption (A) and fluorescence (B) spectra of IN-1, IN-2, IN-3, IN-4, and DCJTJB in THF solutions ( $1 \times 10^{-6}$  M).

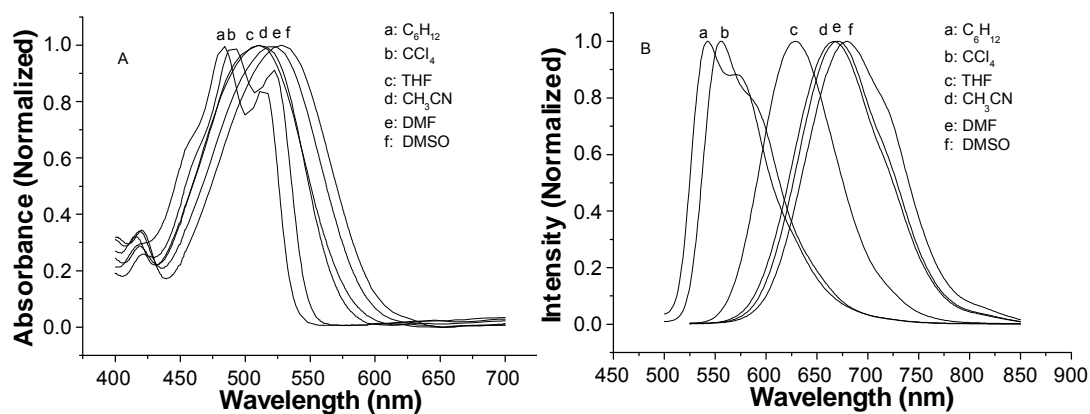

Figure 2S. Normalized absorption (A) and fluorescence (B) spectra of IN-3 in solutions with varied polarity ( $1 \times 10^{-6}$  M).

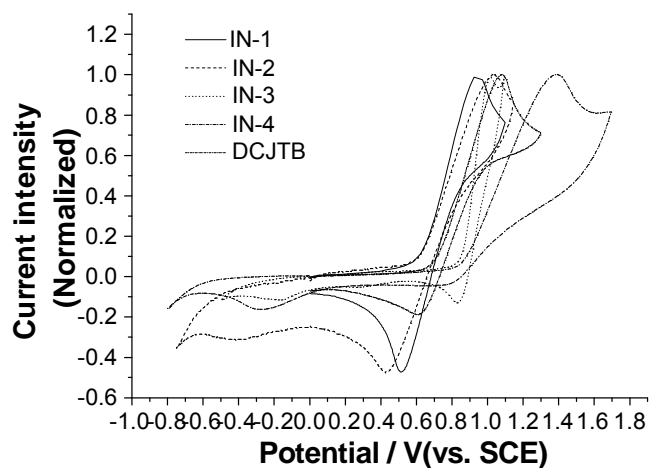

Figure 3S. Cyclic Voltammograms of DCJTBT, IN-1, IN-2, IN-3, and IN-4 in  $\text{CHCl}_3$  with a scan rate of 100 mV/s.

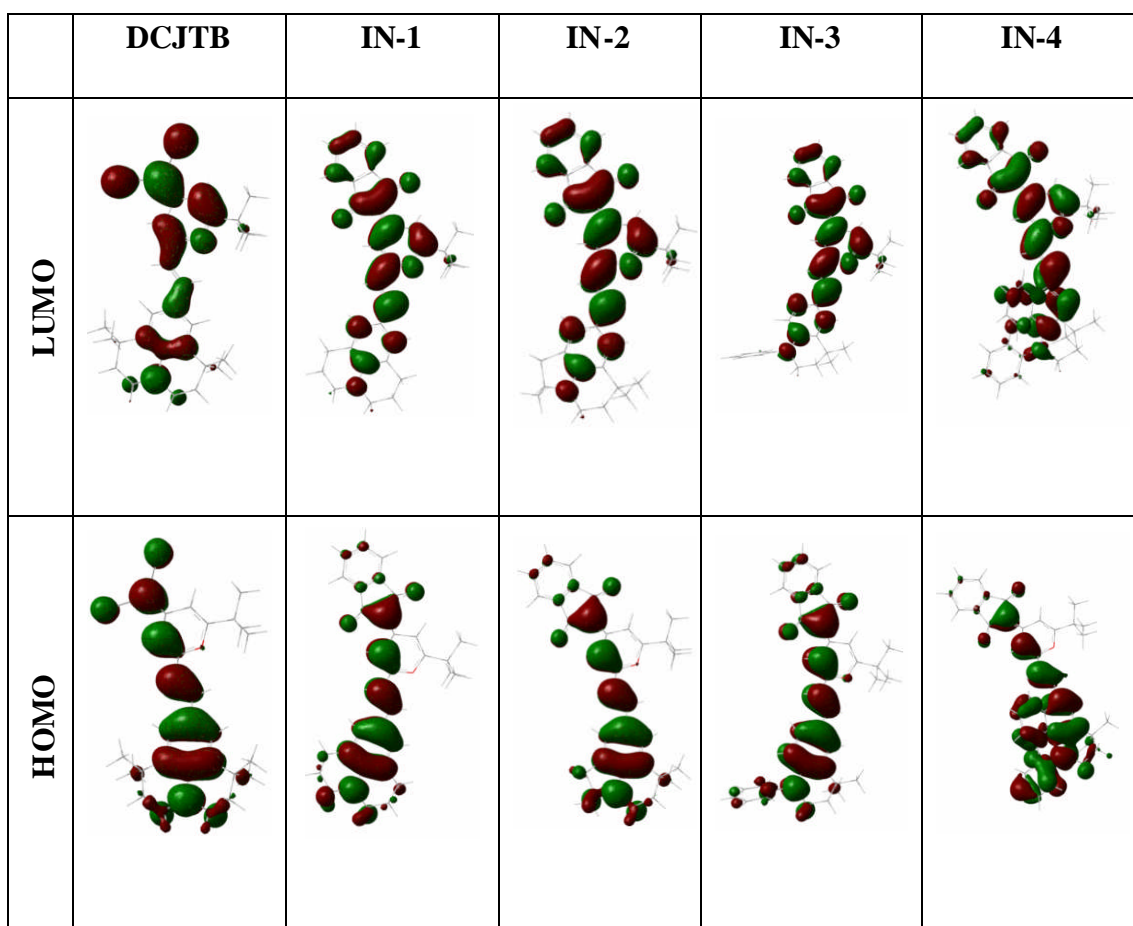

Figure 4S. HOMO and LUMO orbitals for the optimized ground-state structures of DCJTBT, IN-1, IN-2, IN-3, and IN-4 using B3LYP/6-31G(d) method.
